# Supplementary material for: Magnolol and Honokiol Inhibited the Function and Expression of BCRP with Mechanism Exploration
Source: MDPI journal article supplement (doi:10.3390/molecules26237390), 2021-12-06
Supplement: s1 [file s1]

## Supplementary Materials

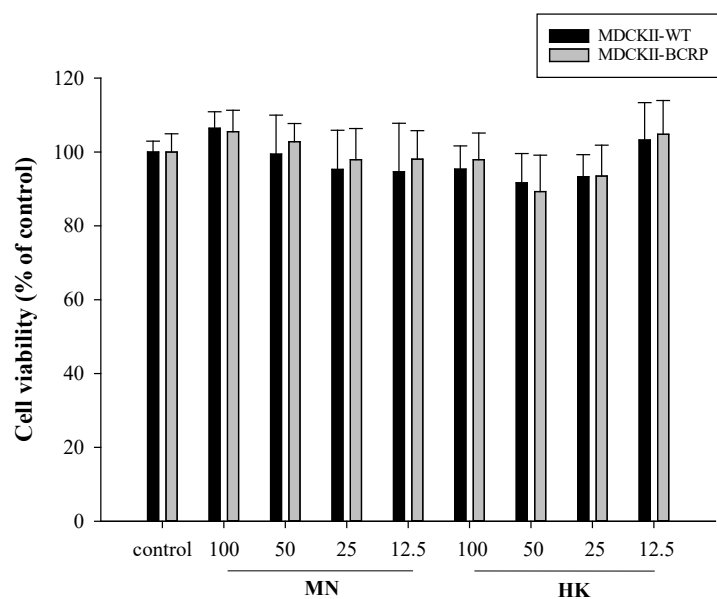

Figure S1. Effects of MN ( $\mu\text{M}$ ) and HK ( $\mu\text{M}$ ) on the cell viability of MDCKII-WT and MDCKII-BCRP at 1 hr. (Mean  $\pm$  S.D.) Control: 0.01% DMSO in reaction buffer.

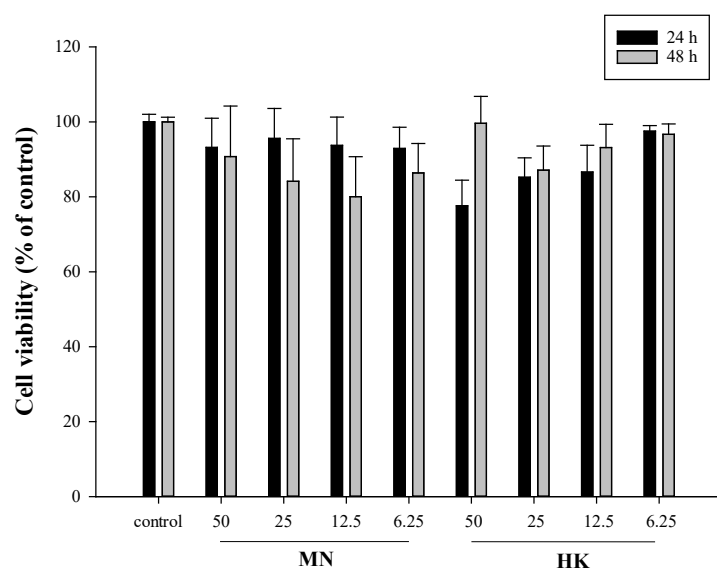

Figure S2. Effects of MN ( $\mu\text{M}$ ) and HK ( $\mu\text{M}$ ) on the cell viability of MDCKII-BCRP at 24 and 48 hr. (Mean  $\pm$  S.D.) Control: 0.01% DMSO in reaction buffer.
